# Supplementary material for: Controllable vacancy strategy mediated by organic ligands of nickel fluoride alkoxides for high-performance aqueous energy storage
Source: Royal Society of Chemistry journal article supplement (doi:10.1039/d2ta08004d), 2023-01-01
Supplement: d2ta08004d1.pdf [file d2ta08004d1.pdf]

## *Supporting Information*

# **Controllable Vacancy Strategy Mediated by Organic Ligands of Nickel Fluoride Alkoxides for High-Performance Aqueous Energy Storage**

Wei Shi, ‡<sup>a</sup> Zeshuo Meng, ‡<sup>a</sup> Zijin Xu, <sup>a</sup> Jian Xu, <sup>a</sup> Xucong Sun, <sup>a</sup> Haoshan Nan, <sup>a</sup> Chenxu Zhang, <sup>a</sup> Shansheng Yu, \*<sup>a</sup> Xiaoying Hu \*<sup>b</sup> and Hongwei Tian \*<sup>a</sup>

\* Corresponding author.

<sup>a</sup> Key Laboratory of Automobile Materials of MOE, School of Materials Science and Engineering, Jilin University, Changchun, 130012, China. E-mail: yuss@jlu.edu.cn, tianhw@jlu.edu.cn.

<sup>b</sup> College of Science and Laboratory of Materials Design and Quantum Simulation, Changchun University, Changchun 130022, China. E-mail: huxy@ccu.edu.cn.

‡ These authors contributed equally to this work.

## Experimental Section

### 1. Chemicals and reagents

$\text{NiCl}_2 \cdot 6\text{H}_2\text{O}$  was purchased from Shanghai Macklin Biochemical Co., Ltd.  $\text{NH}_4\text{F}$  was obtained from Xilong Science Co., Ltd. The urea was provided by Aladdin Industrial Corporation. The solvents ethanol, ethylene glycol, 1-propanol, and 1-butanol were all of analytical grade and purchased from Sinopharm Chemical Reagent Co., Ltd.  $\text{K}_3[\text{Fe}(\text{CN})_6]$ ,  $\text{Bi}(\text{NO}_3)_3 \cdot 5\text{H}_2\text{O}$ , polyvinylpyrrolidone (PVP), and  $\text{HNO}_3$  were obtained from Beijing Chemical Works.

### 2. Synthesis of $\text{Ni}(\text{OH})_2$

The  $\text{Ni}(\text{OH})_2$  sample was prepared by hydrolysis of urea. To this end, urea (0.451 g, 7.5 mmol) and  $\text{NiCl}_2 \cdot 6\text{H}_2\text{O}$  (0.444g, 1.87 mmol) were first dissolved in 20 ml ethylene glycol solvent (EG). The mixture was transferred to an autoclave and heated at 120 °C for 4 h to complete the reaction. The subsequent sample treatment process was the same as the mentioned above procedure.

### 3. Synthesis of HHP $\text{Bi}_2\text{O}_3$

The Bi-Fe TBA precursor was first prepared by solution method followed by etching using KOH solution to yield HHP  $\text{Bi}_2\text{O}_3$ .<sup>1</sup> Specifically, 100 ml aqueous solution containing  $\text{K}_3[\text{Fe}(\text{CN})_6]$  (0.332 g) was added dropwise to 100 ml water and ethanol containing  $\text{Bi}(\text{NO}_3)_3 \cdot 5\text{H}_2\text{O}$  (0.488 g), polyvinylpyrrolidone (PVP) (3.0 g), and  $\text{HNO}_3$  (5 mL). The Bi-Fe TBA precursor was obtained after standing still at room temperature for 12 h. Next, Bi-Fe TBA precursor (10 mg) was added to 10 ml of KOH (0.05 g) solution and stirred for 2 h to obtain the HHP  $\text{Bi}_2\text{O}_3$  sample.

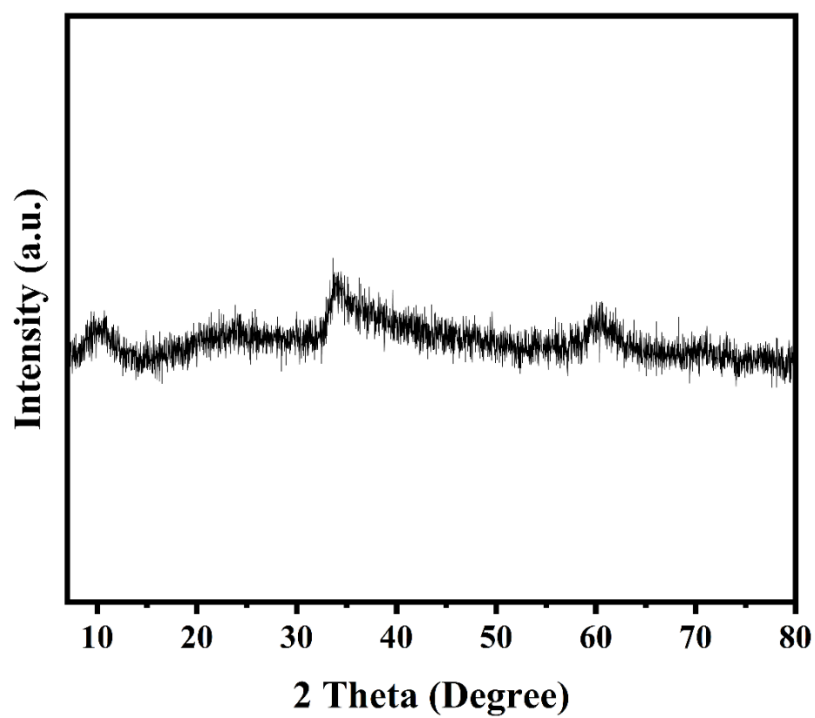

**Figure S1.** XRD patterns of Ni(OH)<sub>2</sub> samples.

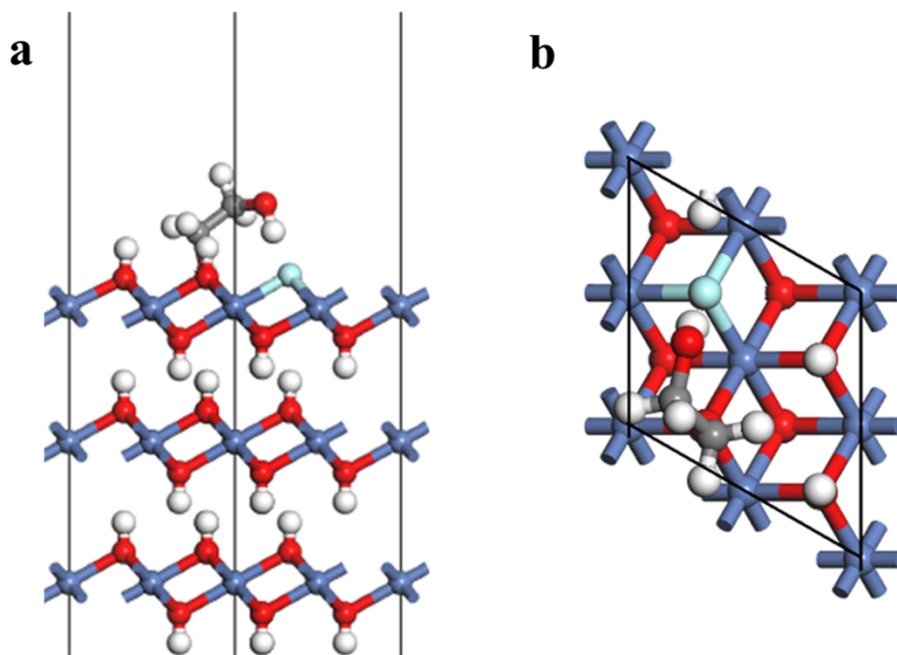

**Figure S2.** (a) Test plot and (b) top view of the structural computational model.

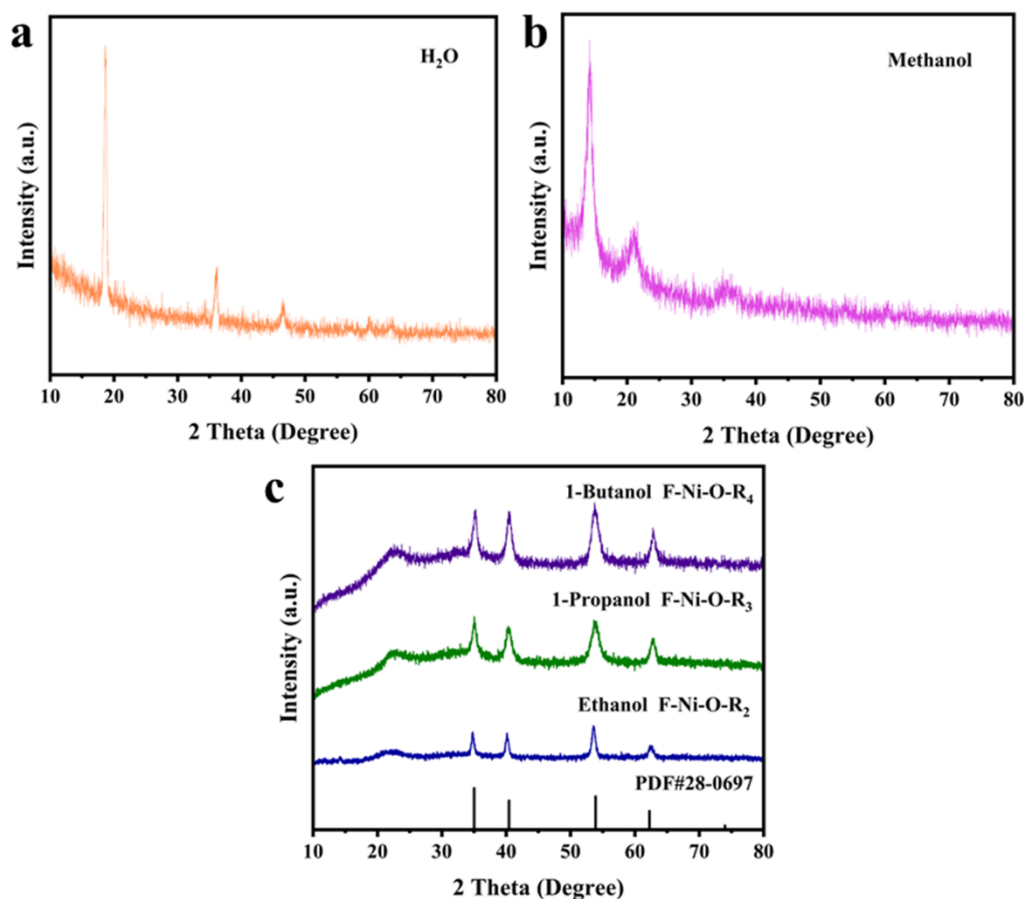

**Figure S3.** XRD patterns of the samples synthesized in (a) H<sub>2</sub>O, (b) methanol, (c) 1-propanol, and 1-butanol solvents.

The XRD profiles of prepared samples using water without carbon chains and methanol with shorter carbon chain solvents under other unchanged experimental conditions are shown in **Figure S3(a)** and (b), respectively. Obviously, the diffraction peaks did not depict the crystal structural features of F-Ni-O<sub>2</sub>-R<sub>2</sub>, indicating failed synthesis. However, samples synthesized in alcohol solvents composed of carbon chains with two C atoms or more showed different XRD patterns (**Figure S3(c)**). Therefore, this method showed good universality with mechanism equations that can be expressed by Equations (1)-(3):

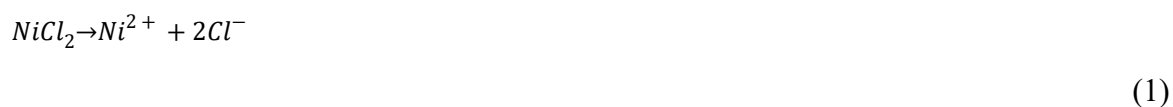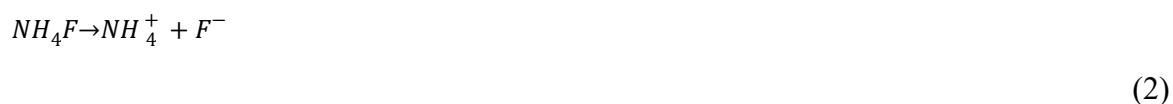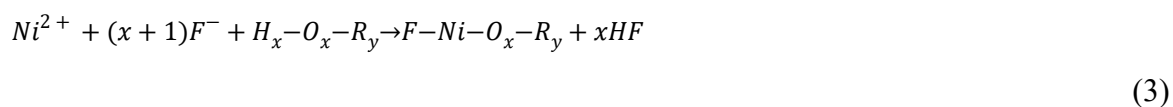

The structural calculation of F-Ni-O<sub>2</sub>-R<sub>2</sub> synthesized with ethylene glycol solvent (Figure 1a) revealed a distance between the H element at the end of the carbon chain and the F element

of 1.682 Å. This value fitted well the distance range of hydrogen bonding. Therefore, hydrogen bonds were formed between the H and F atoms, and the mechanism of hydrogen bonding for stabilizing the structure could be deduced. In fact, Ni(OH)<sub>2</sub> could stably exist due to the strong ionic bond between Ni<sup>2+</sup> and OH<sup>-</sup> ions. As a single ion, F<sup>-</sup> exhibited extremely strong electronegativity, but still displayed relatively weak electronegativity compared to OH<sup>-</sup>. The decrease in the electron attraction ability relative to OH<sup>-</sup> rendered Ni-F bond less strong than that of Ni-OH, making it difficult to maintain the corresponding structure. However, the electron cloud of F<sup>-</sup> shifted to the direction of the carbon chain after the introduction of hydrogen bonds, while F<sup>-</sup> for Ni<sup>2+</sup> side exhibited enhanced electropositivity. This caused the electron cloud of Ni<sup>2+</sup> to move towards the F<sup>-</sup> side, resulting in relatively stable structure. Therefore, hydrogen bonds can be generated to stabilize the structure for carbon chains with a length greater than or equal to 2, forming the corresponding F-Ni-O<sub>x</sub>-R<sub>y</sub> structure. The two phases of F-Ni-OH and F-Ni-OR could not be synthesized as expected using water and methanol, confirming the importance of introducing organic ligand structures and generating hydrogen bonds for structural stability.

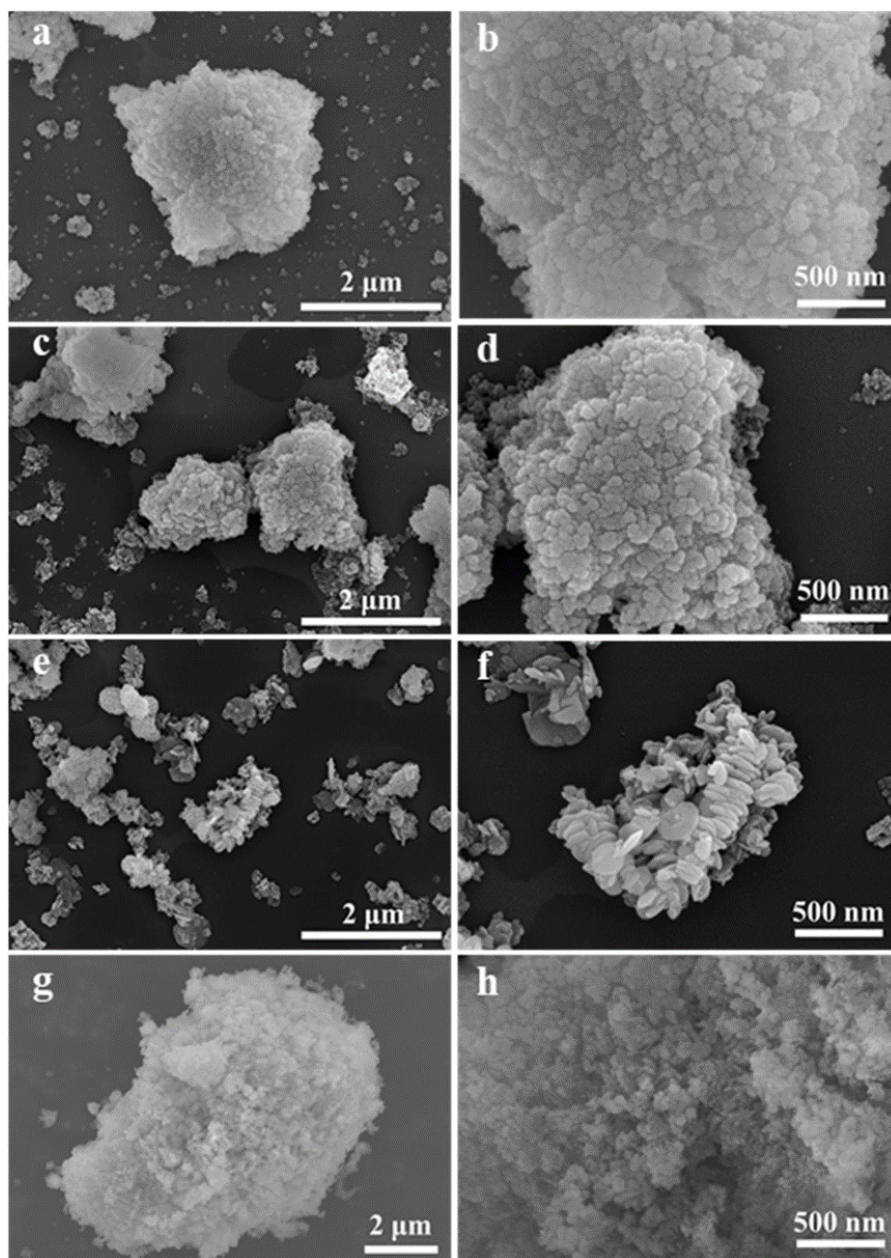

**Figure S4.** SEM images (a, b) of F-Ni-O-R<sub>2</sub>, (c, d) F-Ni-O-R<sub>3</sub>, (e, f) F-Ni-O-R<sub>4</sub>, and (g, h) Ni(OH)<sub>2</sub>.

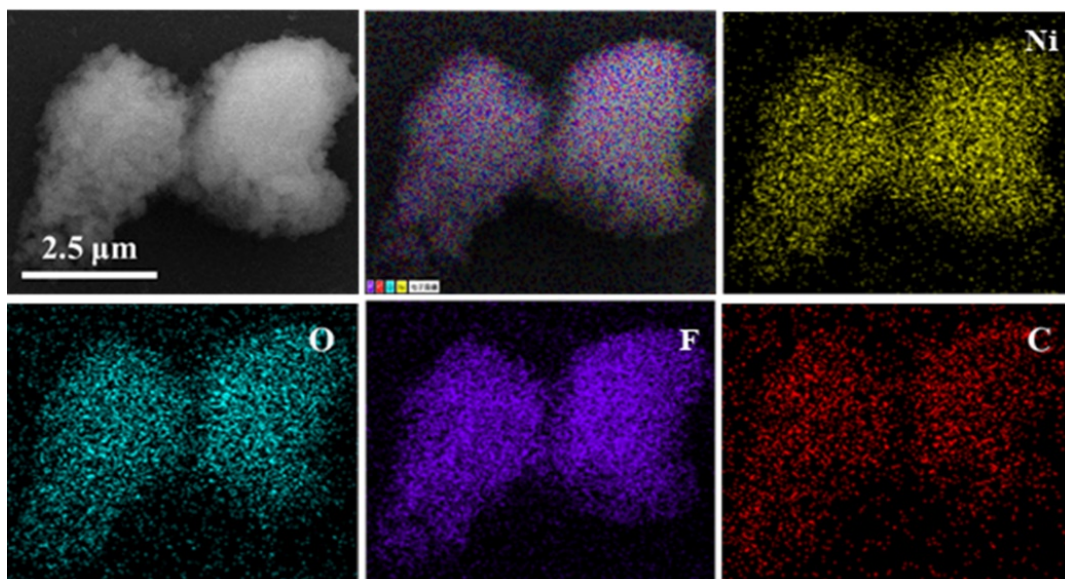

**Figure S5.** The energy dispersion spectra (EDS) mapping images of F-Ni-O<sub>2</sub>-R<sub>2</sub> sample.



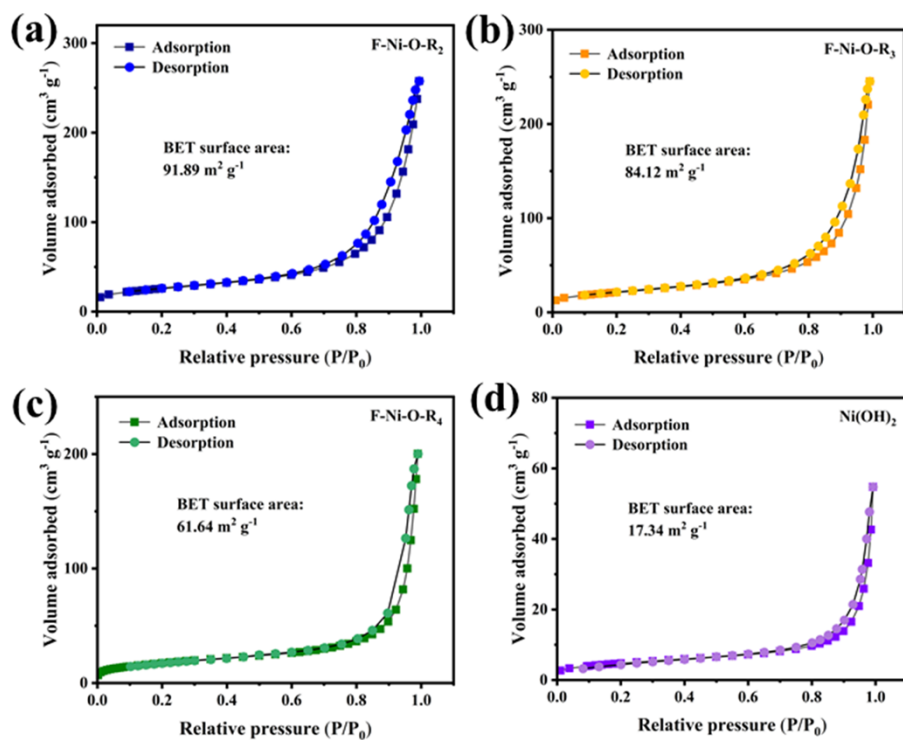

**Figure S6.** Nitrogen sorption isotherms of (a) F-Ni-O-R<sub>2</sub>, (b) F-Ni-O-R<sub>3</sub>, (c) F-Ni-O-R<sub>4</sub>, and (d) Ni(OH)<sub>2</sub>.

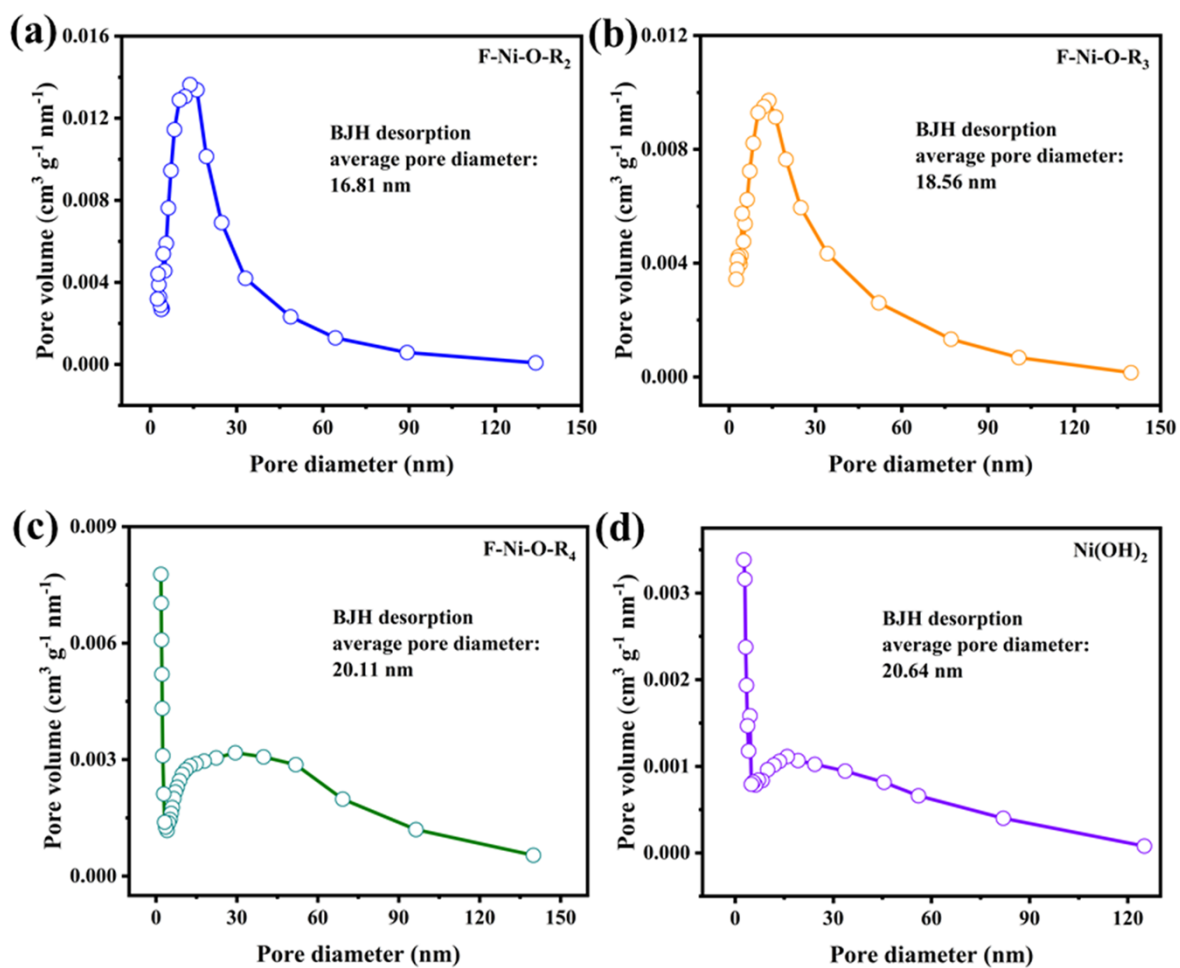

Figure S7. Pore size distributions of synthetic samples.

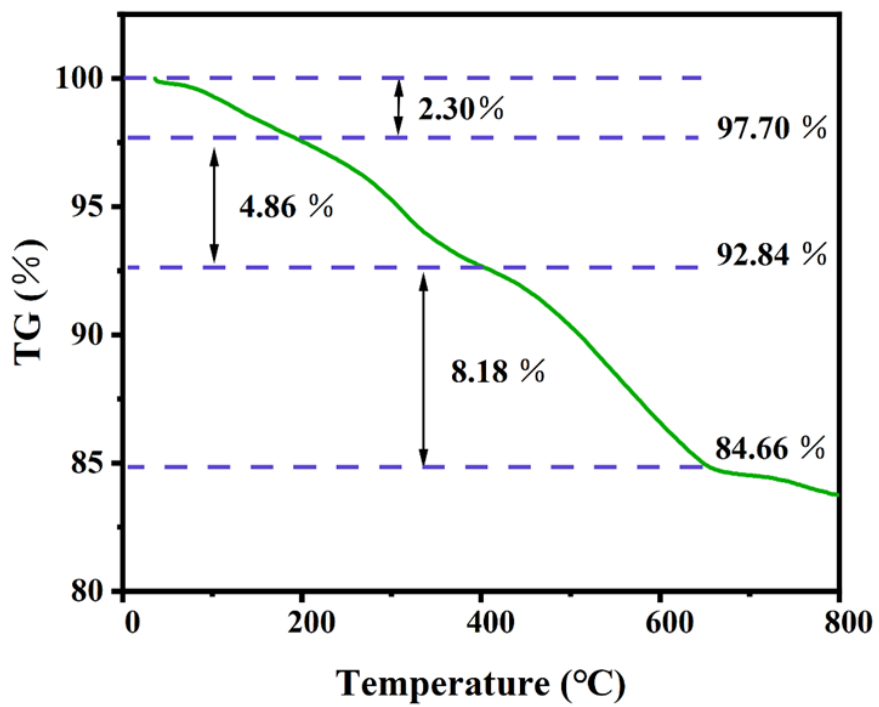

**Figure S8.** TGA curve of F-Ni-O<sub>2</sub>-R<sub>2</sub> sample.

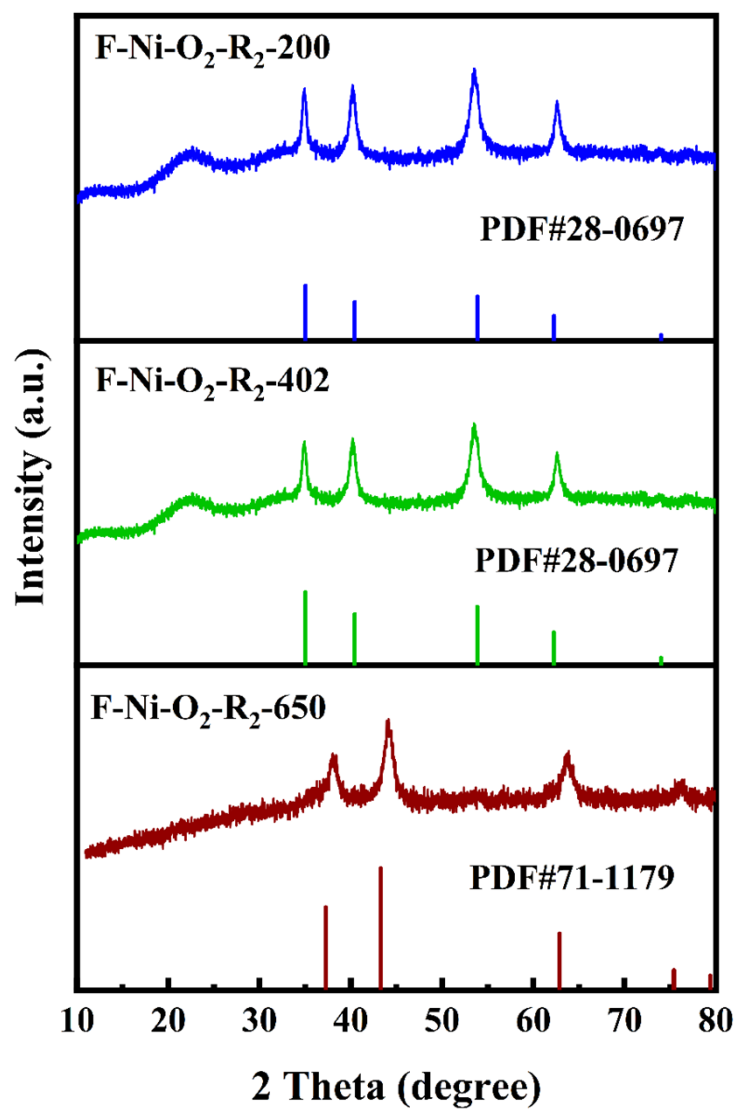

**Figure S9.** XRD patterns corresponding to different temperature stages in TGA of F-Ni-O<sub>2</sub>-R<sub>2</sub> sample.

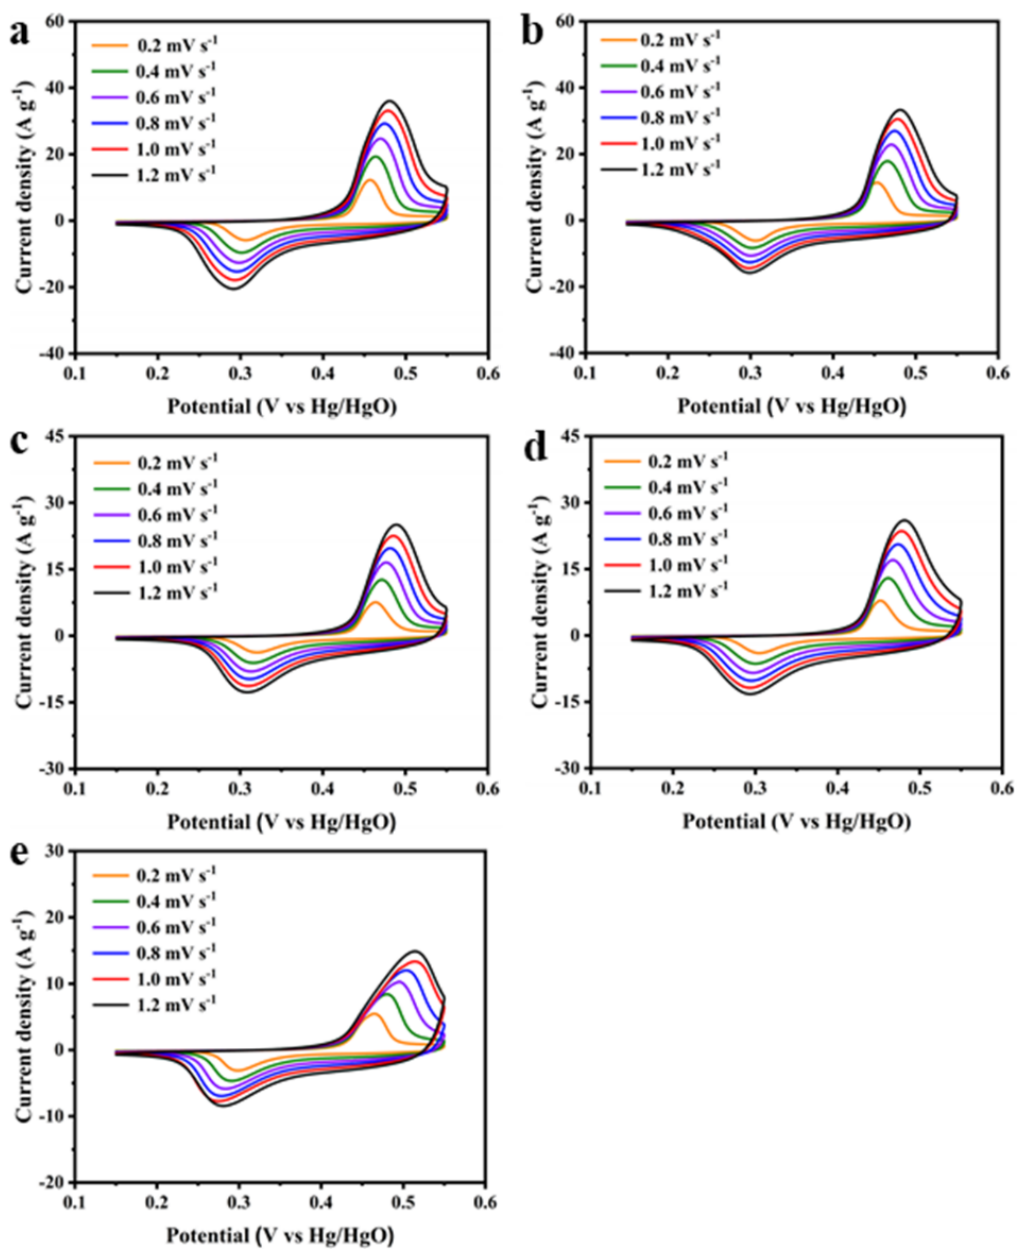

**Figure S10.** CV plots at 0.2-1.2 mV s<sup>-1</sup> of (a) F-Ni-O<sub>2</sub>-R<sub>2</sub> electrode, (b) F-Ni-O-R<sub>2</sub> electrode, (c) F-Ni-O-R<sub>3</sub> electrode, (d) F-Ni-O-R<sub>4</sub> electrode, and (e) Ni(OH)<sub>2</sub> electrode.

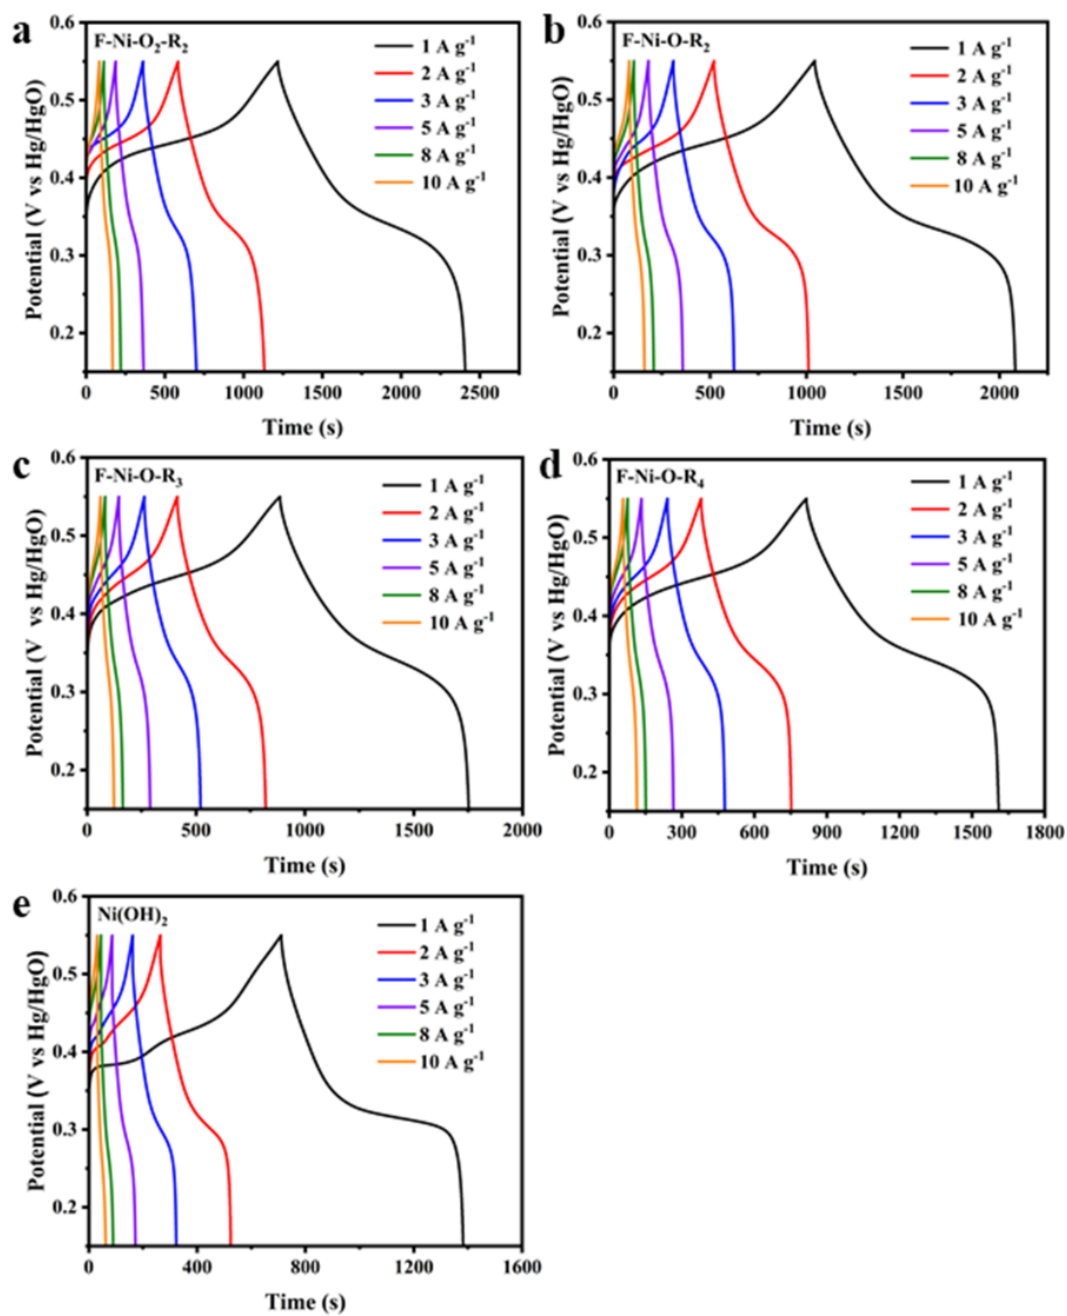

**Figure S11.** GCD curves at 1-10 A g<sup>-1</sup> of (a) F-Ni-O<sub>2</sub>-R<sub>2</sub> electrode, (b) F-Ni-O-R<sub>2</sub> electrode, (c) F-Ni-O-R<sub>3</sub> electrode, (d) F-Ni-O-R<sub>4</sub> electrode, and (e) Ni(OH)<sub>2</sub> electrode.

|                                     |                                                                                    |
|-------------------------------------|------------------------------------------------------------------------------------|
| F-Ni-O <sub>2</sub> -R <sub>2</sub> | 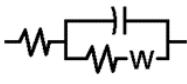 |
| F-Ni-O-R <sub>2</sub>               |  |
| F-Ni-O-R <sub>3</sub>               |  |
| F-Ni-O-R <sub>4</sub>               |  |
| Ni(OH) <sub>2</sub>                 |  |

**Figure S12.** The fitting equivalent circuit models of prepared candidate electrodes.

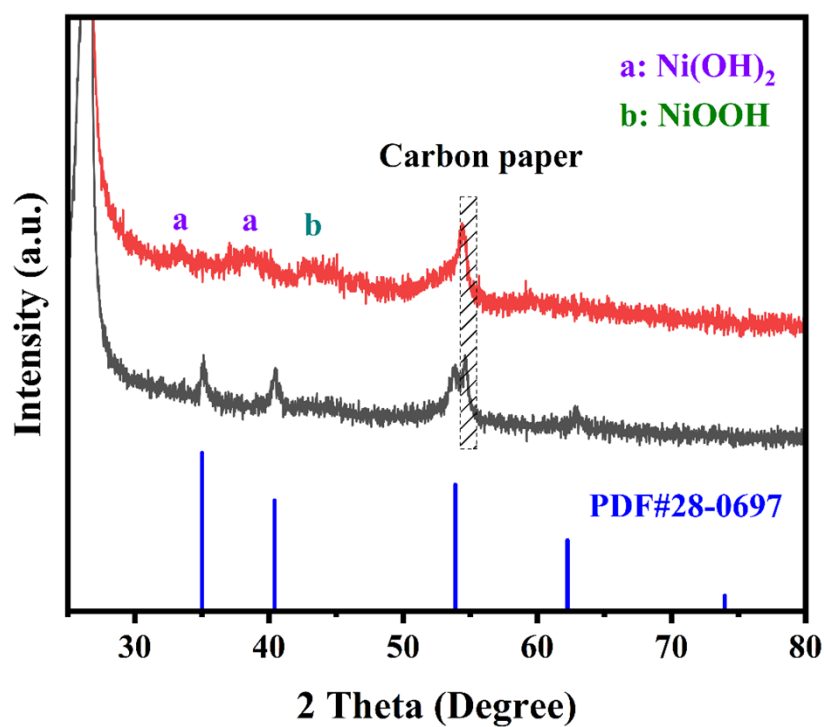

**Figure S13.** XRD patterns of F-Ni-O<sub>2</sub>-R<sub>2</sub> sample loaded on carbon paper before and after preactivation (Ni(OH)<sub>2</sub> and NiOOH referenced to PDF#73-1520 and PDF#06-0075 cards, respectively).

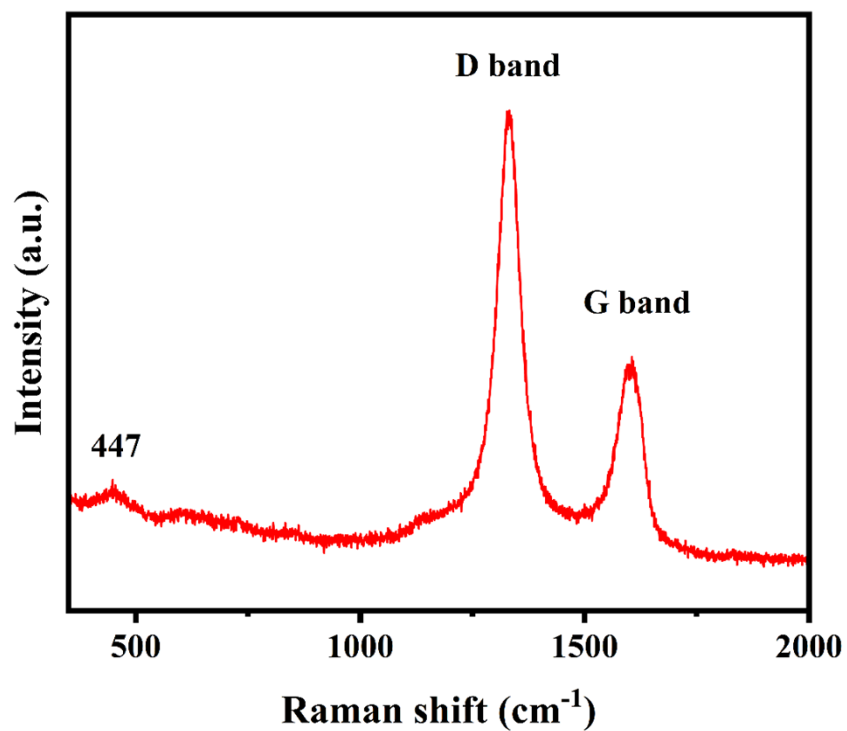

**Figure S14.** Raman pattern of F-Ni-O<sub>2</sub>-R<sub>2</sub> sample after preactivation.

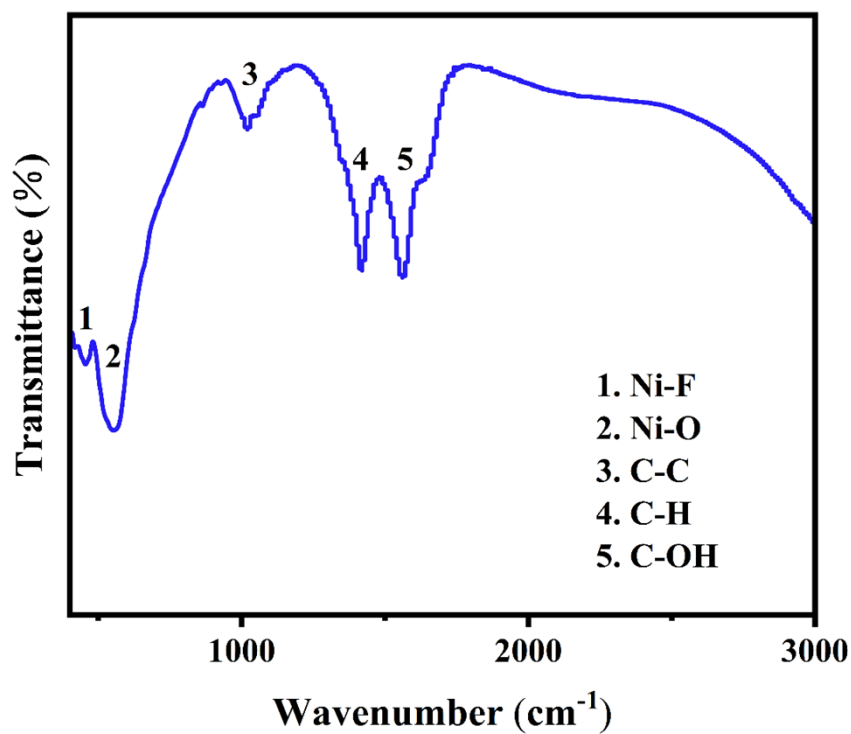

**Figure S15.** IR spectrum of F-Ni-O<sub>2</sub>-R<sub>2</sub> sample after preactivation.



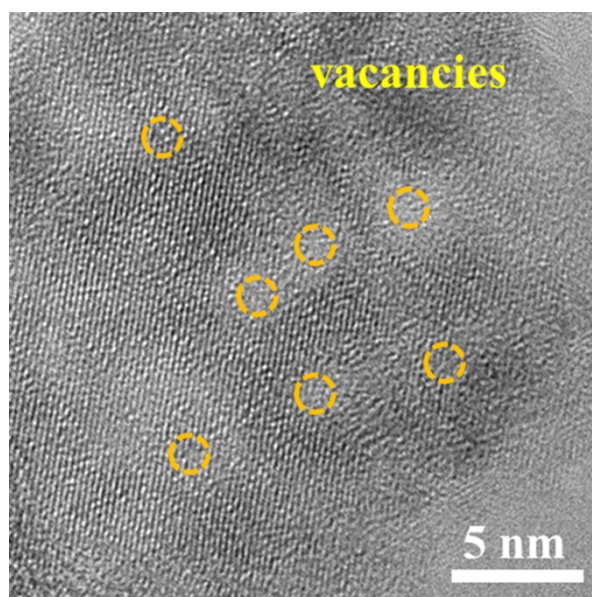

**Figure S16.** HRTEM image of F-Ni-O<sub>2</sub>-R<sub>2</sub> samples after preactivation.

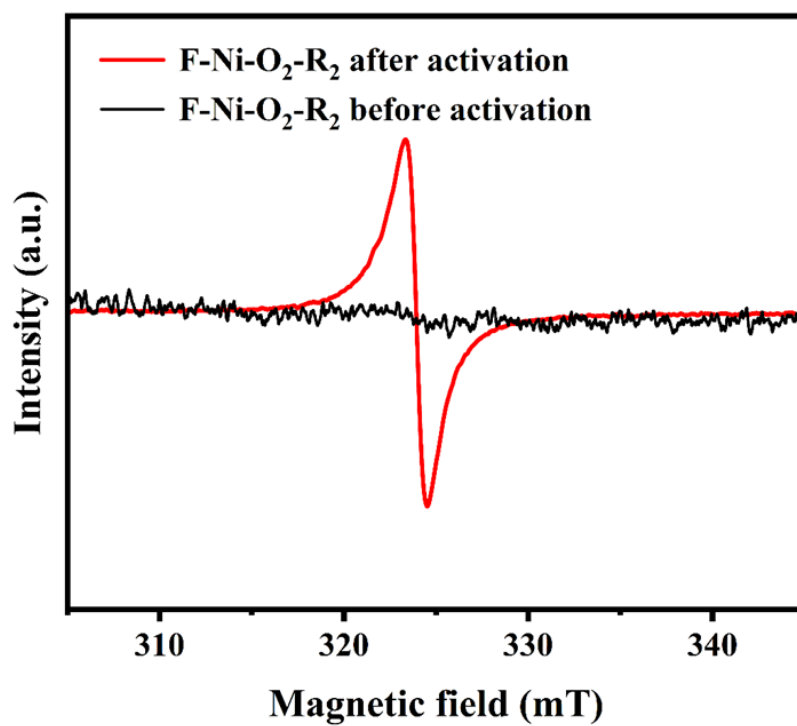

**Figure S17.** Comparison of EPR signals of F-Ni-O<sub>2</sub>-R<sub>2</sub> samples before and after activation.

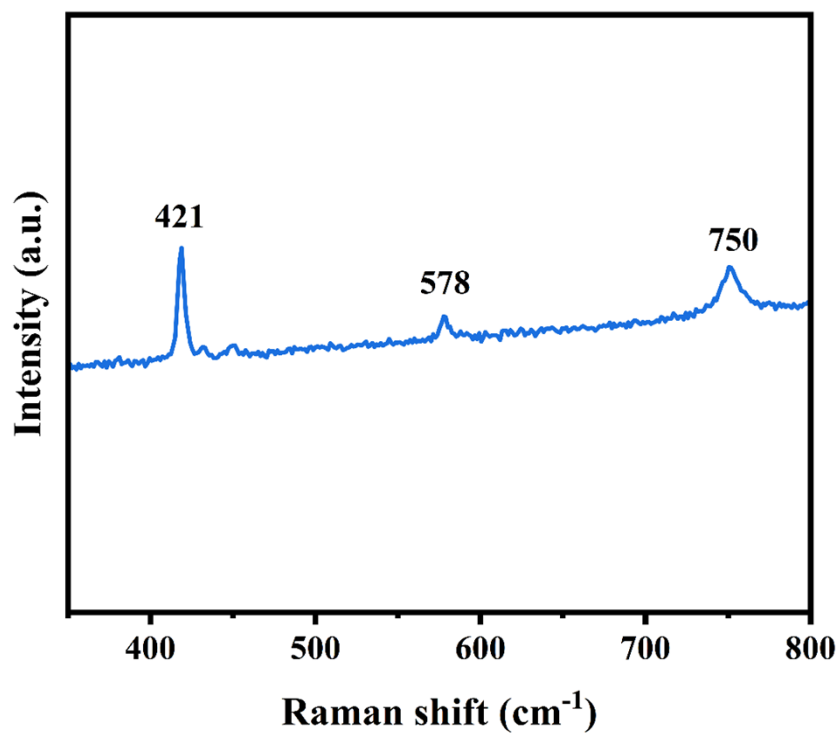

**Figure S18.** Raman spectrum of F-Ni-O<sub>2</sub>-R<sub>2</sub> sample in the initial state.

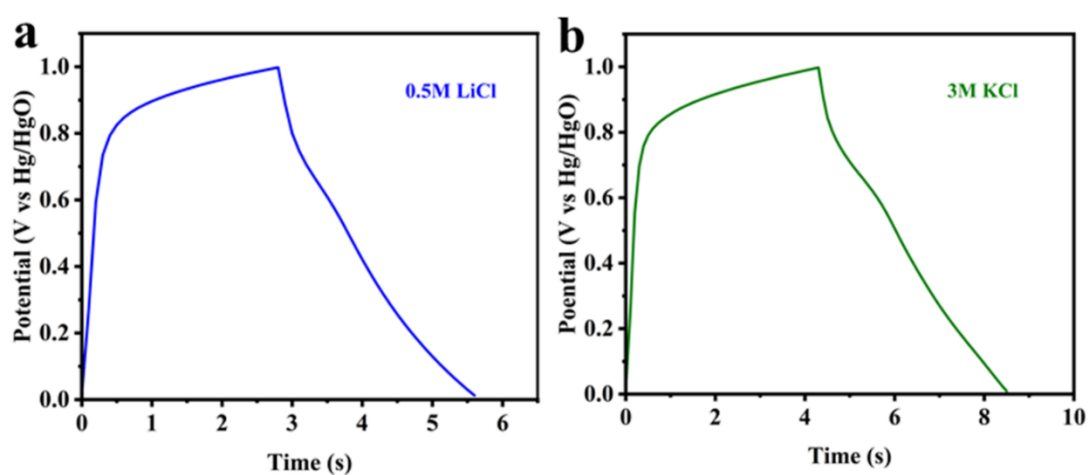

**Figure S19.** GCD curves at 2 A g<sup>-1</sup> of F-Ni-O<sub>2</sub>-R<sub>2</sub> electrode in neutral electrolyte: (a) 0.5 M LiCl and (b) 3 M KCl.

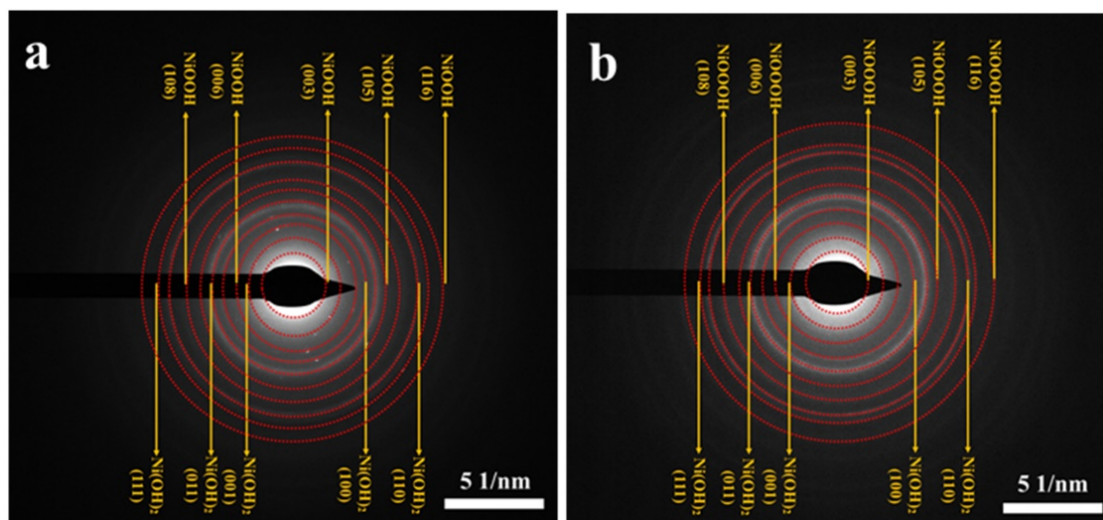

**Figure S20.** SAED patterns of F-Ni-O<sub>2</sub>-R<sub>2</sub> electrode in fully charged (a) and discharged (b) states after preactivation.

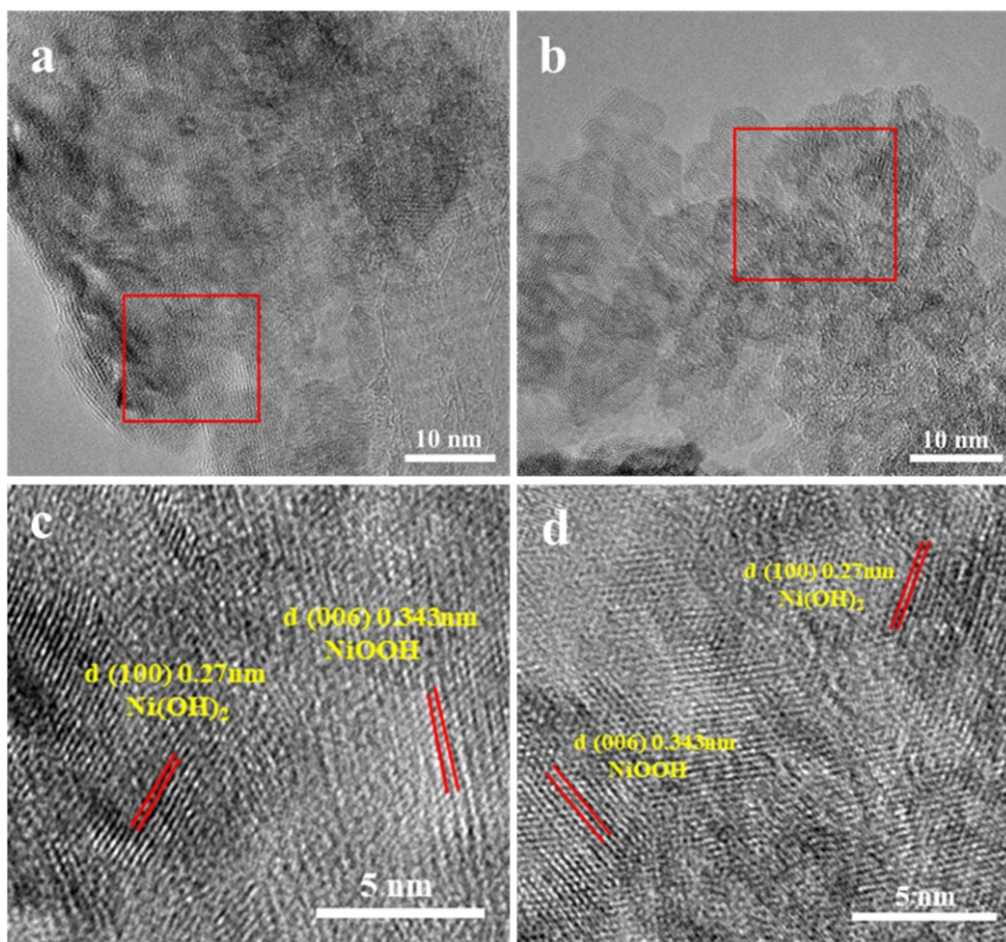

**Figure S21.** *Ex-situ* HRTEM patterns of F-Ni-O<sub>2</sub>-R<sub>2</sub> electrode in fully charged (a) and discharged (b) states after preactivation. (c) and (d) Selected areas in (a) and (b), respectively.

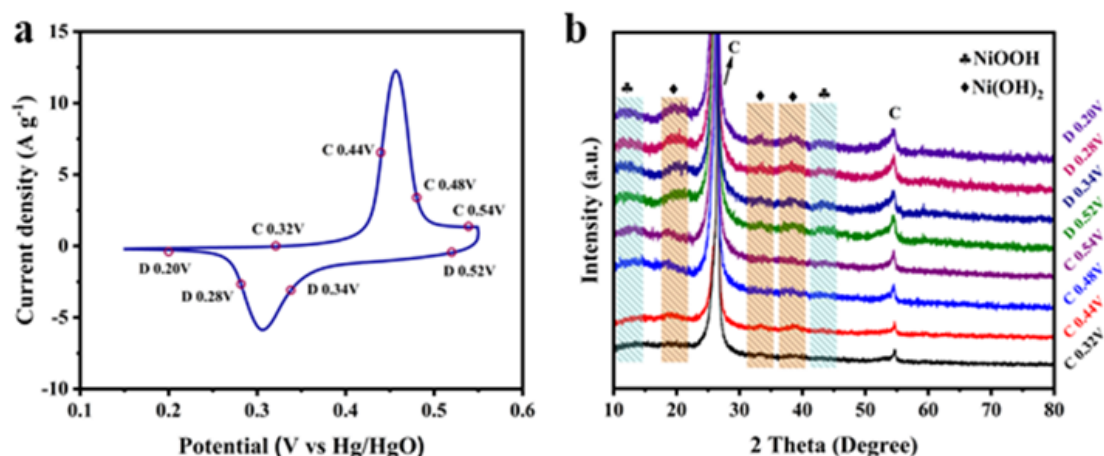

**Figure S22.** (a) CV curve at  $0.2 \text{ mV s}^{-1}$  of F-Ni-O<sub>2</sub>-R<sub>2</sub> after preactivation. (b) *Ex-situ* XRD patterns of F-Ni-O<sub>2</sub>-R<sub>2</sub> derivatives with different discharge/charge states, corresponding to the redox peak positions in (a).

*Ex-situ* XRD was performed to obtain structural information of the generated species. As shown in **Figure S22(a)**, the valence state changes of nickel in CV curve during charge were recorded as 0.32, 0.44, 0.48, and 0.54 V (denoted as C<sub>x</sub>, where x is the charging voltage), while the values during discharge were 0.52, 0.34, 0.28, and 0.20 V (denoted as D<sub>y</sub>, where y is the discharge voltage). In **Figure S22(b)**, the original Ni<sub>4</sub>OHF<sub>7</sub> signal completely disappeared after preactivation of F-Ni-O<sub>2</sub>-R<sub>2</sub> electrode and replaced by the new peak signals of NiOOH and Ni(OH)<sub>2</sub>. In addition, the signal of NiOOH during the charging process (potential range 0.32 V-0.54 V) showed an increasing trend, indicating the gradual conversion of Ni(OH)<sub>2</sub> to NiOOH. At voltage exceeding 0.55 V and the start of discharge stage, the characteristic peaks related to Ni(OH)<sub>2</sub> became more obvious to complete the reversible phase transition of the energy storage process.

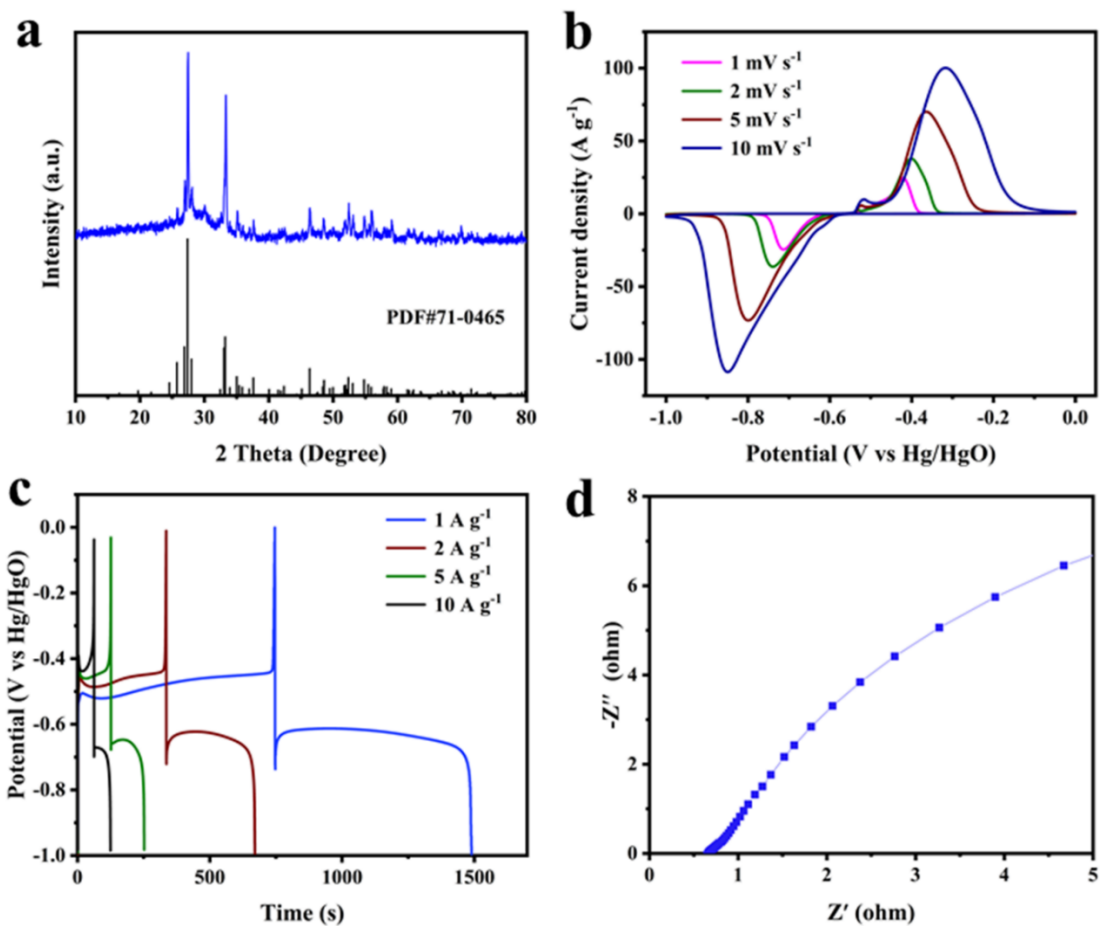

**Figure S23.** (a) XRD patterns of synthesized HHP Bi<sub>2</sub>O<sub>3</sub> sample, (b) CV plots at 1-10 mV s<sup>-1</sup>, (c) GCD curves at 1-10 A g<sup>-1</sup>, and (d) Nyquist plots of HHP Bi<sub>2</sub>O<sub>3</sub> electrode.



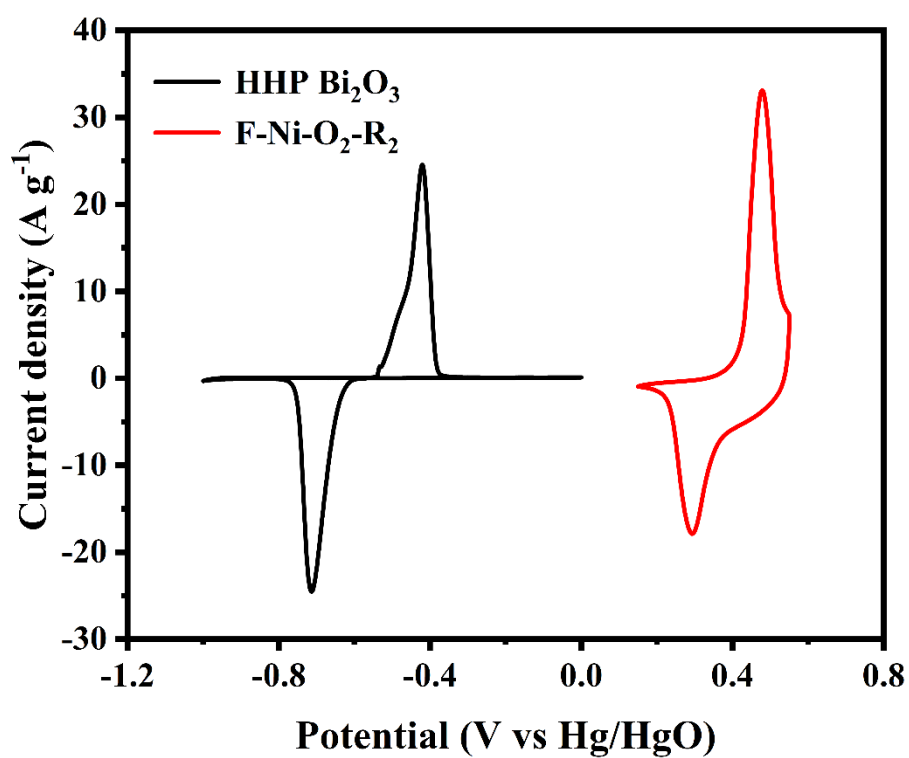

**Figure S24.** CV curves of F-Ni-O<sub>2</sub>-R<sub>2</sub> and HHP Bi<sub>2</sub>O<sub>3</sub> electrodes at the scan rate of 1 mV s<sup>-1</sup>.

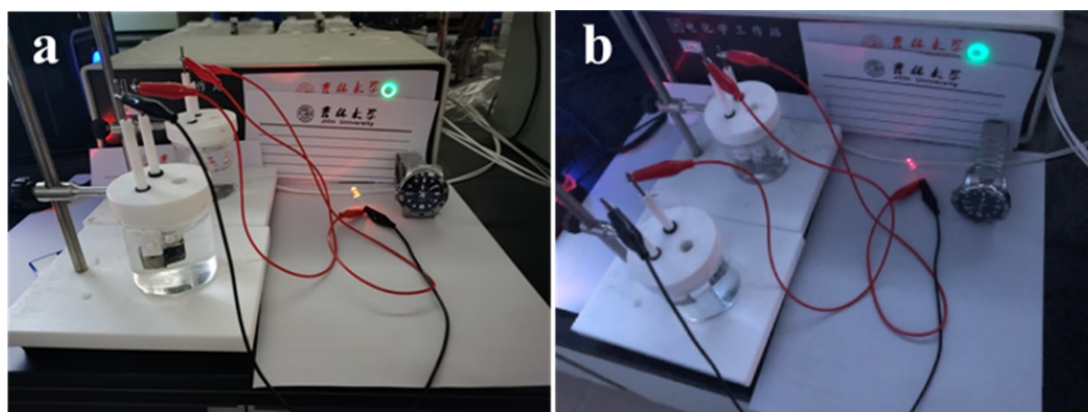

**Figure S25.** The energy storage device assembled by two sets of F-Ni-O<sub>2</sub>-R<sub>2</sub>//HHP Bi<sub>2</sub>O<sub>3</sub>. (a) Device starts to light the LED bulb. (b) Device continues to supply power to the LED bulb after 30 min.

## Supplemental tables

**Table S1.** The crystalline parameters of F-Ni-O<sub>2</sub>-R<sub>2</sub> and Ni(OH)<sub>2</sub>.

| Sample                              | PDF card | Crystal system | Space group | Cell(a×b×c) Å     |
|-------------------------------------|----------|----------------|-------------|-------------------|
| F-Ni-O <sub>2</sub> -R <sub>2</sub> | 28-0697  | hexagonal      | P-3m1 (164) | 2.973×2.973×4.598 |
| Ni(OH) <sub>2</sub>                 | 73-1520  | hexagonal      | P-3m1 (164) | 3.114×3.114×4.617 |
| Ni(OH) <sub>2</sub>                 | 14-0117  | hexagonal      | P-3m1 (164) | 3.126×3.126×4.605 |

**Table S2.** Diffraction peak positions and corresponding crystal planes in XRD profiles.

| <sup>2</sup><br>Theta | 35.1° | 40.4° | 53.9° | 63.0° | 72.3° | 74.2° | 77.0° | 87.5° | 95.5° |
|-----------------------|-------|-------|-------|-------|-------|-------|-------|-------|-------|
| Crystal<br>planes     | (100) | (011) | (012) | (110) | (103) | (200) | (112) | (202) | (104) |



**Table S3.** Comparison of the capacitance obtained in this work with reported values.

| Electrode                                            | Electrolyte             | Specific capacitance                            | Reference |
|------------------------------------------------------|-------------------------|-------------------------------------------------|-----------|
| F-Ni-O <sub>2</sub> -R <sub>2</sub>                  | 3 M KOH + 0.5 M<br>LiOH | 2975.0 F g <sup>-1</sup> at 1 A g <sup>-1</sup> | This work |
| NiCoMoS@LDH/NF                                       | 3 M KOH                 | 2968.8 F g <sup>-1</sup> at 1 A g <sup>-1</sup> | 2         |
| Ni-MOFs/V <sub>2</sub> CT <sub>x</sub> -<br>MXene    | 1 M KOH                 | 2453 F g <sup>-1</sup> at 1 A g <sup>-1</sup>   | 3         |
| F-CoNi-A                                             | 1 M KOH                 | 2476.0 F g <sup>-1</sup> at 1 A g <sup>-1</sup> | 4         |
| NiCoP@C@Ni(OH) <sub>2</sub>                          | 3 M KOH                 | 2300.8 F g <sup>-1</sup> at 1 A g <sup>-1</sup> | 5         |
| Ni-HF                                                | 2 M KOH                 | 2030.3 F g <sup>-1</sup> at 1 A g <sup>-1</sup> | 6         |
| Co-Zn(OH)F                                           | 2 M KOH                 | 1970.0 F g <sup>-1</sup> at 1 A g <sup>-1</sup> | 7         |
| NiCoP-CoP                                            | 2 M KOH                 | 1969 F g <sup>-1</sup> at 1 A g <sup>-1</sup>   | 8         |
| KNiF <sub>3</sub> @CNTs-8                            | 3 M KOH + 0.5 M<br>LiOH | 1642.8 F g <sup>-1</sup> at 1 A g <sup>-1</sup> | 9         |
| Al-Co(OH)F                                           | 2 M KOH                 | 1576 F g <sup>-1</sup> at 1 A g <sup>-1</sup>   | 10        |
| Co-Ni-B-S                                            | 6 M KOH                 | 1281 F g <sup>-1</sup> at 1 A g <sup>-1</sup>   | 11        |
| CoNiO <sub>2</sub> -Ar                               | 6 M KOH                 | 1172.6 F g <sup>-1</sup> at 1 A g <sup>-1</sup> | 12        |
| Ni <sub>3</sub> Co <sub>1</sub> WO <sub>4</sub> /HPC | 6 M KOH                 | 1084 F g <sup>-1</sup> at 1 A g <sup>-1</sup>   | 13        |
| Ti <sub>3</sub> C <sub>2</sub> /Ni-Co-Al-<br>LDH     | 1 M KOH                 | 748.2 F g <sup>-1</sup> at 1 A g <sup>-1</sup>  | 14        |

**Table S4.** The specific capacitances under current densities of 1-10A g<sup>-1</sup>.

| Electrode                           | Specific capacitance (F g <sup>-1</sup> ) |                     |                     |                     |                     |                      |
|-------------------------------------|-------------------------------------------|---------------------|---------------------|---------------------|---------------------|----------------------|
|                                     | 1 A g <sup>-1</sup>                       | 2 A g <sup>-1</sup> | 3 A g <sup>-1</sup> | 5 A g <sup>-1</sup> | 8 A g <sup>-1</sup> | 10 A g <sup>-1</sup> |
| F-Ni-O <sub>2</sub> -R <sub>2</sub> | 2975.0                                    | 2735.0              | 2533.5              | 2216.3              | 2136.0              | 2107.5               |
| F-Ni-O-R <sub>2</sub>               | 2610.0                                    | 2451.5              | 2355.0              | 2222.5              | 2066.0              | 1960.0               |
| F-Ni-O-R <sub>3</sub>               | 2167.0                                    | 2030.0              | 1939.5              | 1798.8              | 1636.0              | 1537.5               |
| F-Ni-O-R <sub>4</sub>               | 2015.0                                    | 1860.0              | 1776.8              | 1662.5              | 1514.0              | 1425.0               |
| Ni(OH) <sub>2</sub>                 | 1680.0                                    | 1300.0              | 1207.5              | 1075.0              | 898.0               | 777.5                |

**Table S5.** Fitting results of prepared electrodes obtained from the EIS curves.

| Electrode                           | R <sub>s</sub> (Ω) | R <sub>ct</sub> (Ω) | C <sub>dl</sub> (F)    | W (Yo, S·sec <sup>0.5</sup> ) |
|-------------------------------------|--------------------|---------------------|------------------------|-------------------------------|
| F-Ni-O <sub>2</sub> -R <sub>2</sub> | 0.6459             | 0.4656              | 1.52×10 <sup>-3</sup>  | 0.07463                       |
| F-Ni-O-R <sub>2</sub>               | 0.7017             | 0.5270              | 1.21×10 <sup>-3</sup>  | 0.5635                        |
| F-Ni-O-R <sub>3</sub>               | 0.6881             | 1.679               | 2.52×10 <sup>-3</sup>  | 0.5850                        |
| F-Ni-O-R <sub>4</sub>               | 0.9383             | 2.277               | 7.00×10 <sup>-5</sup>  | 0.3761                        |
| Ni(OH) <sub>2</sub>                 | 0.7545             | 3.919               | 1.965×10 <sup>-3</sup> | 0.3157                        |

**Table S6.** Comparison of resistivity test results of F-Ni-O<sub>2</sub>-R<sub>2</sub> before preactivation and F-Ni-O<sub>2</sub>-R<sub>2</sub> after preactivation.

| Sample                                                   | Resistivity ( $\Omega\cdot\text{m}$ ) | Conductivity (S/m) |
|----------------------------------------------------------|---------------------------------------|--------------------|
| F-Ni-O <sub>2</sub> -R <sub>2</sub> before preactivation | 6.4202                                | 0.1558             |
| F-Ni-O <sub>2</sub> -R <sub>2</sub> after preactivation  | 6.3394                                | 0.1577             |
| F-Ni-O <sub>2</sub> -R <sub>2</sub> before preactivation | 0.5738                                | 1.7428             |
| F-Ni-O <sub>2</sub> -R <sub>2</sub> after preactivation  | 0.5594                                | 1.7876             |

**Table S7.** Comparison of the performance of assembled F-Ni-O<sub>2</sub>-R<sub>2</sub>//HHP Bi<sub>2</sub>O<sub>3</sub> device with others reported in the literature.

| Aqueous energy storage devices                                                                                        | Potential Window (V) | Energy density (Wh kg <sup>-1</sup> ) | power density (W kg <sup>-1</sup> ) | Reference |
|-----------------------------------------------------------------------------------------------------------------------|----------------------|---------------------------------------|-------------------------------------|-----------|
| F-Ni-O <sub>2</sub> -R <sub>2</sub> //HHP Bi <sub>2</sub> O <sub>3</sub>                                              | 0-1.6 V              | 55.1-127.6                            | 800-32000                           | This work |
| Bi <sub>2</sub> O <sub>3</sub> /Bi <sub>2</sub> Se <sub>3</sub><br>NFs//NiCoSe <sub>2</sub> /Ni <sub>0.85</sub> Se NP | 0-1.6 V              | 43.6-88.4                             | 2400-32000                          | 15        |
| N-GNTs@O <sub>v</sub> -Bi <sub>2</sub> O <sub>3</sub> NSAs//N-GNTs@CoNi <sub>2</sub> S <sub>4</sub> NP                | 0-1.6 V              | 51.3-86.6                             | 1600-24000                          | 16        |
| Ni - Zn - Co - S-0.33<br>NSAs/NF//Bi <sub>2</sub> O <sub>3</sub> /NF                                                  | 0-1.6 V              | 66.9-91.7                             | 458-6696                            | 17        |
| Ni <sub>x</sub> Co <sub>1-x</sub> (OH) <sub>2</sub> //Bi <sub>2</sub> O <sub>3</sub>                                  | 0-1.6 V              | 37.0-66.0                             | 356-6439                            | 1         |
| Ni(OH) <sub>2</sub> //(BiO) <sub>4</sub> CO <sub>3</sub> (OH) <sub>2</sub>                                            | 0-1.6 V              | 27.3-92.0                             | 27.3-670                            | 18        |
| ESCNF@Bi <sub>2</sub> O <sub>3</sub> //CF@NiCo <sub>2</sub> O                                                         | 0-1.9 V              | 18.0-25.1                             | 786.2-2949                          | 19        |
| 4                                                                                                                     |                      |                                       |                                     |           |
| Bi//10#/Ag(37%)                                                                                                       | 0-1.6 V              | 3.8-25.4                              | 400-2800                            | 20        |

**Table S8.** Comparison of the performance of F-Ni-O<sub>2</sub>-R<sub>2</sub>//AC asymmetric supercapacitor with other Ni-based ASC devices reported in the literature.

| ASC devices                                                | Potential Window (V) | Energy density (Wh kg <sup>-1</sup> ) | power density (W kg <sup>-1</sup> ) | Reference |
|------------------------------------------------------------|----------------------|---------------------------------------|-------------------------------------|-----------|
| F-Ni-O <sub>2</sub> -R <sub>2</sub> //AC                   | 0-1.6 V              | 29.1-64.6                             | 800-32000                           | This work |
| CoP/NiCoP//AC                                              | 0-1.6 V              | 28.4-51.6                             | 800-12000                           | 21        |
| NiMn-LDH//AC                                               | 0-1.6 V              | 16.9-46.7                             | 1700-13500                          | 22        |
| MnCo <sub>2</sub> O <sub>4</sub> @Ni(OH) <sub>2</sub> //AC | 0-1.6 V              | 7.26-48                               | 1400-14900                          | 23        |
| MnCo-LDH@Ni(OH) <sub>2</sub> //AC                          | 0-1.5 V              | 9.8-47.9                              | 750.7-5020.5                        | 24        |
| Ni(OH) <sub>2</sub> //AC                                   | 0-1.3 V              | 12.6-35.7                             | 490-1670                            | 25        |

## References

- 1 G. Zan, T. Wu, P. Hu, Y. Zhou, S. Zhao, S. Xu, J. Chen, Y. Cui and Q. Wu, *Energy Stor. Mater.*, 2020, **28**, 82-90.
- 2 K. Zhang, H.-Y. Zeng, M.-X. Wang, H.-B. Li, W. Yan, H.-B. Wang and Z.-H. Tang, *J. Mater. Chem. A*, 2022, **10**, 11213-11224.
- 3 X. Yang, Y. Tian, S. Li, Y.-P. Wu, Q. Zhang, D.-S. Li and S. Zhang, *J. Mater. Chem. A*, 2022, **10**, 12225-12234.
- 4 M. Chu, Q. Xu, S. Chen, Y. Hu, H. Jiang and C. Li, *Chem. Eng. Sci.*, 2021, **240**, 116649.
- 5 Q. Zong, H. Yang, Q. Wang, Q. Zhang, Y. Zhu, H. Wang and Q. Shen, *Chem. Eng. J.*, 2019, **361**, 1-11.
- 6 J.-F. Zhang, Y. Wang, X. Shu, C.-P. Yu, M.-F. Xiao, J.-W. Cui, Y.-Q. Qin, H.-M. Zheng, Y. Zhang, D. Chen, P. M. Ajayan and Y.-C. Wu, *Sci. Bull.*, 2018, **63**, 322-330.
- 7 S. Jiang, M. Pang, J. Zhao, B. Xing, Q. Pan, H. Yang, W. Qu, L. Gu and H. Wang, *Chem. Eng. J.*, 2017, **326**, 1048-1057.
- 8 W. Song, J. Wu, G. Wang, S. Tang, G. Chen, M. Cui and X. Meng, *Adv. Funct. Mater.*, 2018, **28**, 1804620.
- 9 H. Fan, X. Zhang, Y. Wang, J. Lang and R. Gao, *J. Power Sources*, 2020, **474**, 228603.
- 10 Z. Wang, J. Chang, L. Chen, Y. Li, D. Wu, F. Xu, K. Jiang and Z. Gao, *Electrochim. Acta*, 2019, **323**, 134815.
- 11 Q. Wang, Y. Luo, R. Hou, S. Zaman, K. Qi, H. Liu, H. S. Park and B. Y. Xia, *Adv. Mater.*, 2019, **31**, e1905744.
- 12 J. Ye, X. Zhai, L. Chen, W. Guo, T. Gu, Y. Shi, J. Hou, F. Han, Y. Liu, C. Fan, G. Wang, S. Peng and X. Guo, *J. Energy Chem.*, 2021, **62**, 252-261.
- 13 F. Shi, S. Zhao, J. Yang, Y. Tong, J. Li, S. Zhai, X. Zhao, S. Wu, H. Li, Q. An and K. Wang, *J. Mater. Chem. A*, 2022, **10**, 12679-12691.
- 14 Y. Lin, K. Sun, S. Liu, X. Chen, Y. Cheng, W. C. Cheong, Z. Chen, L. Zheng, J. Zhang, X. Li, Y. Pan and C. Chen, *Adv. Energy Mater.*, 2019, **9**, 1901213.
- 15 A. Meng, X. Yuan, T. Shen, Z. Li, Q. Jiang, H. Xue, Y. Lin and J. Zhao, *J. Mater. Chem. A*, 2019, **7**, 17613-17625.
- 16 J. Zhao, Z. Li, T. Shen, X. Yuan, G. Qiu, Q. Jiang, Y. Lin, G. Song, A. Meng and Q. Li, *J. Mater. Chem. A*, 2019, **7**, 7918-7931.

- 17 Y. Huang, L. Quan, T. Liu, Q. Chen, D. Cai and H. Zhan, *Nanoscale*, 2018, **10**, 14171-14181.
- 18 J. Sun, J. Wang, Z. Li, L. Niu, W. Hong and S. Yang, *J. Power Sources*, 2015, **274**, 1070-1075.
- 19 L. Li, X. Zhang, Z. Zhang, M. Zhang, L. Cong, Y. Pan and S. Lin, *J. Mater. Chem. A*, 2016, **4**, 16635-16644.
- 20 D. Ying, Y. Li, R. Ding, W. Shi, Q. Xu, Y. Huang, Z. Jia, W. Yu, X. Sun, P. Gao, E. Liu and X. Wang, *Adv. Funct. Mater.*, 2021, **31**, 2101353.
- 21 Y. Lin, K. Sun, S. Liu, X. Chen, Y. Cheng, W. C. Cheong, Z. Chen, L. Zheng, J. Zhang, X. Li, Y. Pan and C. Chen, *Adv. Energy Mater.*, 2019, **9**, 1901213.
- 22 Y. Tang, H. Shen, J. Cheng, Z. Liang, C. Qu, H. Tabassum and R. Zou, *Adv. Funct. Mater.*, 2020, **30**, 1908223.
- 23 Y. Zhao, L. Hu, S. Zhao and L. Wu, *Adv. Funct. Mater.*, 2016, **26**, 4085-4093.
- 24 S. Liu, S. C. Lee, U. Patil, I. Shackery, S. Kang, K. Zhang, J. H. Park, K. Y. Chung and S. Chan Jun, *J. Mater. Chem. A*, 2017, **5**, 1043-1049.
- 25 H. B. Li, M. H. Yu, F. X. Wang, P. Liu, Y. Liang, J. Xiao, C. X. Wang, Y. X. Tong and G. W. Yang, *Nat. Commun.*, 2013, **4**, 1894.
